# Supplementary material for: Potent SARS-CoV-2 neutralizing antibodies with protective efficacy against newly emerged mutational variants
Source: PubMed Central journal article supplement (PMC8563728; doi:10.1038/s41467-021-26539-7), 2021-11-02
Supplement: 41467_2021_26539_MOESM1_ESM.pdf [file 41467_2021_26539_MOESM1_ESM.pdf]

1 **Supplementary Information**

2  
3 **Potent SARS-CoV-2 neutralizing antibodies with protective efficacy against**  
4 **newly emerged mutational variants**

5 Tingting Li<sup>1,2,\*</sup>, Xiaojian Han<sup>1,2,\*</sup>, Chenjian Gu<sup>3,\*</sup>, Hangtian Guo<sup>4,5,\*</sup>, Huajun Zhang<sup>6,\*</sup>,  
6 Yingming Wang<sup>1,2,\*</sup>, Chao Hu<sup>1,2</sup>, Kai Wang<sup>7</sup>, Fengjiang Liu<sup>4</sup>, Feiyang Luo<sup>1,2</sup>, Yanan  
7 Zhang<sup>8,9</sup>, Jie Hu<sup>7</sup>, Wang Wang<sup>1,2</sup>, Shenglong Li<sup>1,2</sup>, Yanan Hao<sup>1,2</sup>, Meiyong Shen<sup>10</sup>,  
8 Jingjing Huang<sup>1,2</sup>, Yingyi Long<sup>1,2</sup>, Shuyi Song<sup>1,2</sup>, Ruixin Wu<sup>1,2</sup>, Song Mu<sup>1,2</sup>, Qian  
9 Chen<sup>1,2</sup>, Fengxia Gao<sup>1,2</sup>, Jianwei Wang<sup>1,2</sup>, Shunhua Long<sup>1,2</sup>, Luo Li<sup>1,2</sup>, Yang Wu<sup>3</sup>, Yan  
10 Gao<sup>4</sup>, Wei Xu<sup>3</sup>, Xia Cai<sup>3</sup>, Di Qu<sup>3</sup>, Zherui Zhang<sup>8,9</sup>, Hongqing Zhang<sup>8,9</sup>, Na Li<sup>8,9</sup>,  
11 Qingzhu Gao<sup>7</sup>, Guiji Zhang<sup>7</sup>, Changlong He<sup>7</sup>, Wei Wang<sup>11</sup>, Xiaoyun Ji<sup>5,11</sup>, Ni Tang<sup>7</sup>,  
12 Zhenghong Yuan<sup>3</sup>, Youhua Xie<sup>3,#</sup>, Haitao Yang<sup>4,#</sup>, Bo Zhang<sup>8,#</sup>, Ailong Huang<sup>7,#</sup>&  
13 Aishun Jin<sup>1,2,#</sup>

14 <sup>1</sup>Department of Immunology, College of Basic Medicine, Chongqing Medical  
15 University, Chongqing, 400010, China

16 <sup>2</sup>Chongqing Key Laboratory of Basic and Translational Research of Tumor  
17 Immunology, Chongqing Medical University, Chongqing, 400010, China

18 <sup>3</sup>Key Laboratory of Medical Molecular Virology, Department of Medical Microbiology  
19 and Parasitology, School of Basic Medical Sciences, Shanghai Medical College, Fudan  
20 University, Shanghai, 200032, China

21 <sup>4</sup>Shanghai Institute for Advanced Immunochemical Studies and School of Life Science  
22 and Technology, ShanghaiTech University, Shanghai, 201210, China

23 <sup>5</sup>State Key Laboratory of Pharmaceutical Biotechnology, School of Life Sciences,  
24 Nanjing University, Nanjing, Jiangsu, 210023, China

25 <sup>6</sup>State Key Laboratory of Virology, Wuhan Institute of Virology, Center for Biosafety  
26 Mega-Science, Chinese Academy of Sciences, Wuhan, 430071, China

27 <sup>7</sup>Key Laboratory of Molecular Biology on Infectious Diseases, Ministry of Education,  
28 Chongqing Medical University, Chongqing, 400010, China

29 <sup>8</sup>Key Laboratory of Special Pathogens and Biosafety, Wuhan Institute of Virology,  
30 Center for Biosafety Mega-Science, Chinese Academy of Sciences, Wuhan, 430071,  
31 China

32 <sup>9</sup>University of Chinese Academy of Sciences, Beijing, 100049, China

33 <sup>10</sup>Department of Breast Surgery, Harbin Medical University Cancer Hospital, Harbin,  
34 150000, China

35 <sup>11</sup>Institute of life sciences, Chongqing Medical University, Chongqing, 400010, China

36 \*These authors contributed equally: Tingting Li, Xiaojian Han, Chenjian Gu, Hangtian  
37 Guo, Huajun Zhang, Yingming Wang.

38 #email: [yhxie@fudan.edu.cn](mailto:yhxie@fudan.edu.cn) (Y.H.X); [yanght@shanghaitech.edu.cn](mailto:yanght@shanghaitech.edu.cn) (H.T.Y);  
39 [zhangbo@wh.iov.cn](mailto:zhangbo@wh.iov.cn) (B.Z); [ahuang@cqmu.edu.cn](mailto:ahuang@cqmu.edu.cn) (A.L.H); [aishunjin@cqmu.edu.cn](mailto:aishunjin@cqmu.edu.cn)  
40 (A.S.J)

41

42 Supplementary information

43 Supplementary Figures. 1-12

44 Supplementary Tables 1-3

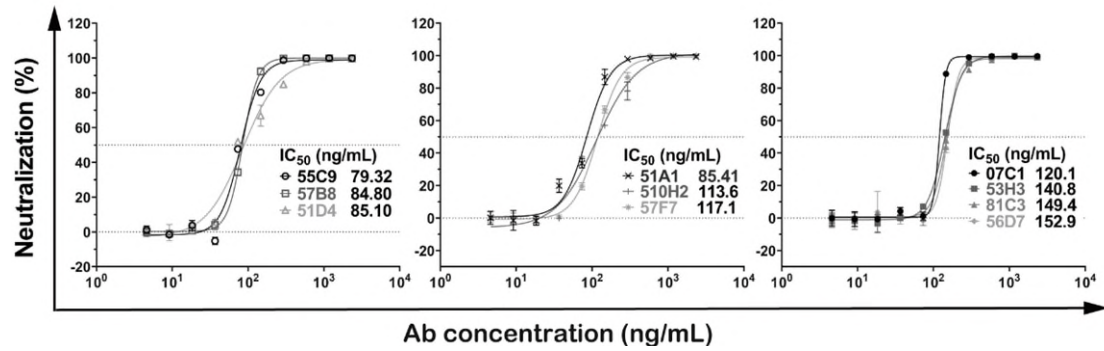

45

46 **Supplementary Fig. 1 The neutralizing efficacy of top 11-20 mAbs against**

47 **authentic SARS-CoV-2 virus.** The capabilities of the top 11-20 mAbs were measured

48 by authentic SARS-CoV-2 (nCoV-SH01) neutralization assay and quantified by qRT-

49 PCR. Dashed line indicated 0% or 50% reduction in viral neutralization. Data for each

50 mAb were obtained from a representative neutralization experiment of three replicates,

51 presented as mean values  $\pm$  SEM.

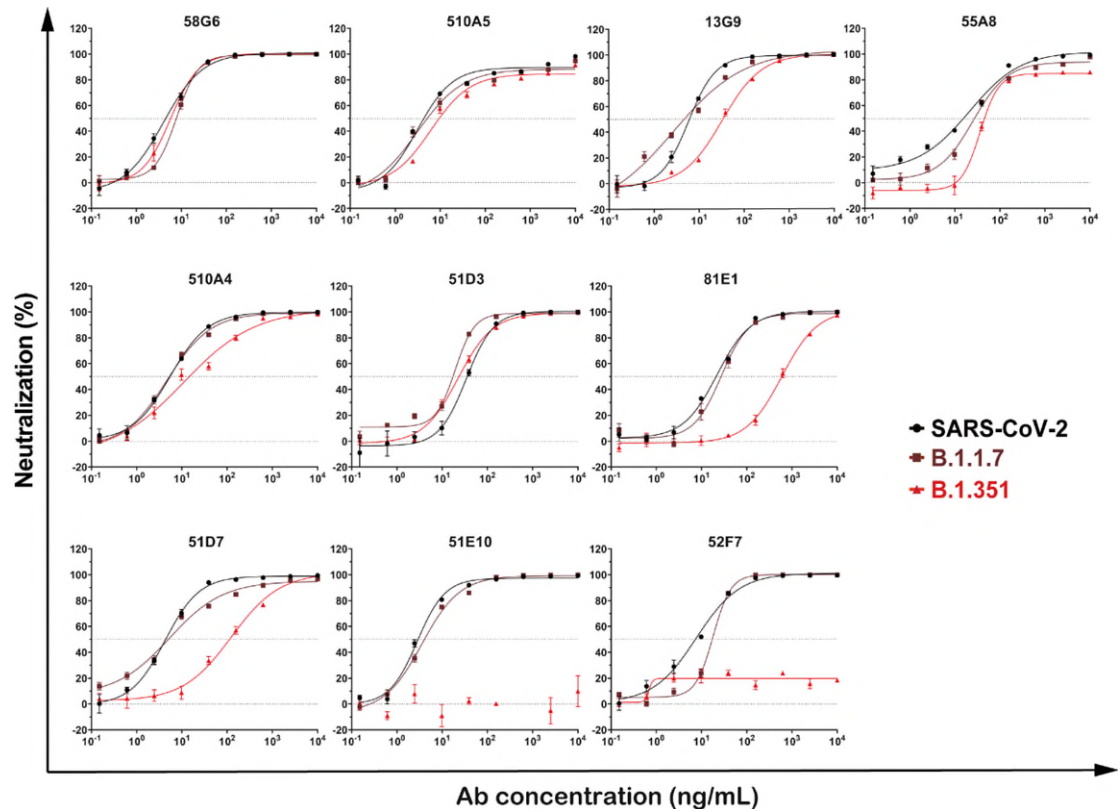

52

53 **Supplementary Fig. 2 The neutralizing capabilities of selected mAbs against**  
 54 **SARS-CoV-2, B.1.1.7 and B.1.351 pseudoviruses.** The neutralizing potencies of the  
 55 top 10 mAbs against SARS-CoV-2, B.1.1.7 and B.1.351 were measured by pseudovirus  
 56 neutralization assay. Dashed line indicated 0% or 50% reduction in the viral  
 57 neutralization. Data for each mAb were obtained from a representative neutralization  
 58 experiment of three replicates, presented as mean values  $\pm$  SEM.

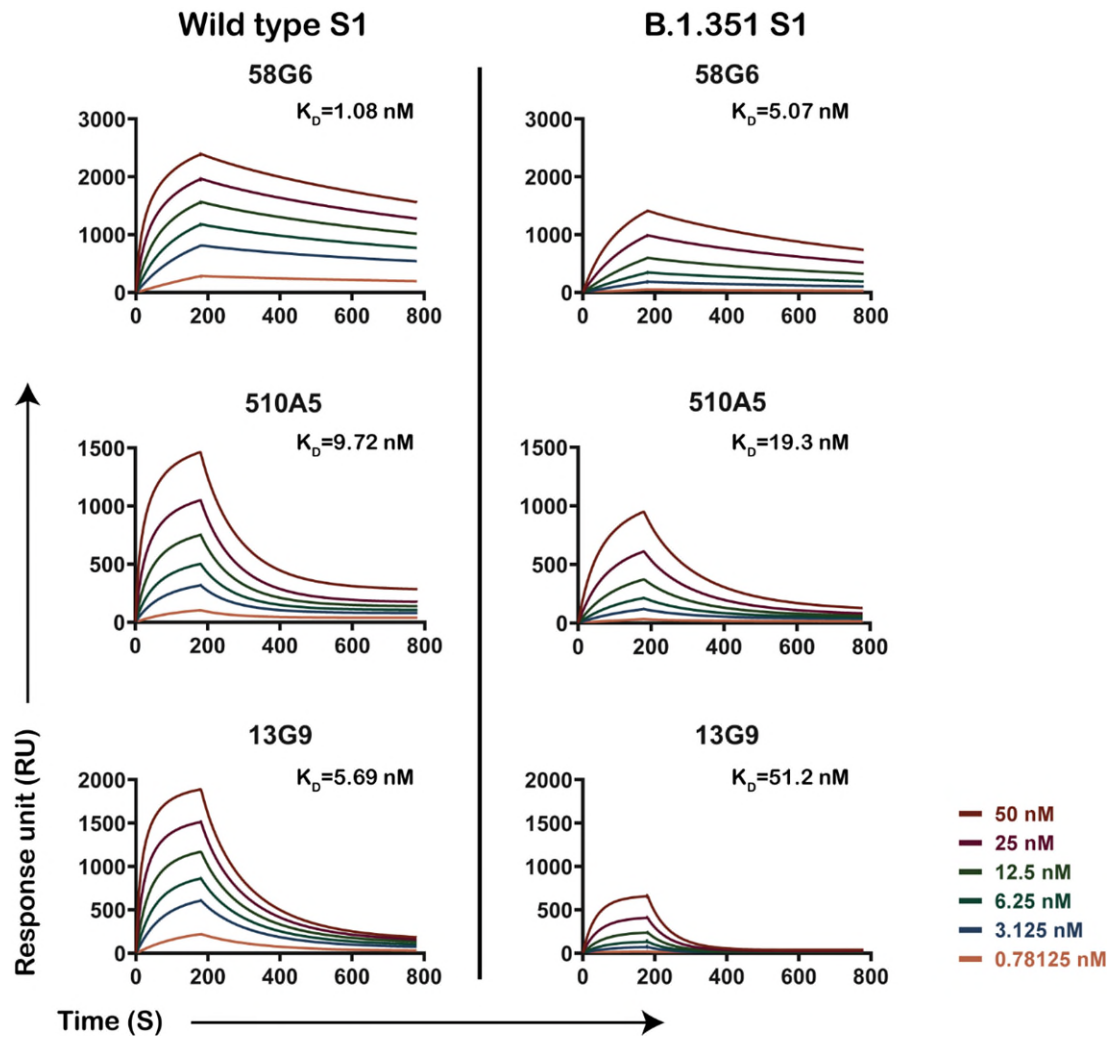

59

60 **Supplementary Fig. 3** The binding kinetics of 58G6, 510A5 and 13G9 to SARS-  
 61 **CoV-2 S1 or B.1.351 S1**. The binding kinetics was determined by the SPR assay. The  
 62 purified mAbs were coated on the CM5 sensor chip followed by the injection of various  
 63 concentrations of soluble recombinant SARS-CoV-2 S1 or B.1.351 S1 proteins. Data  
 64 were representative of 2 independent experiments.

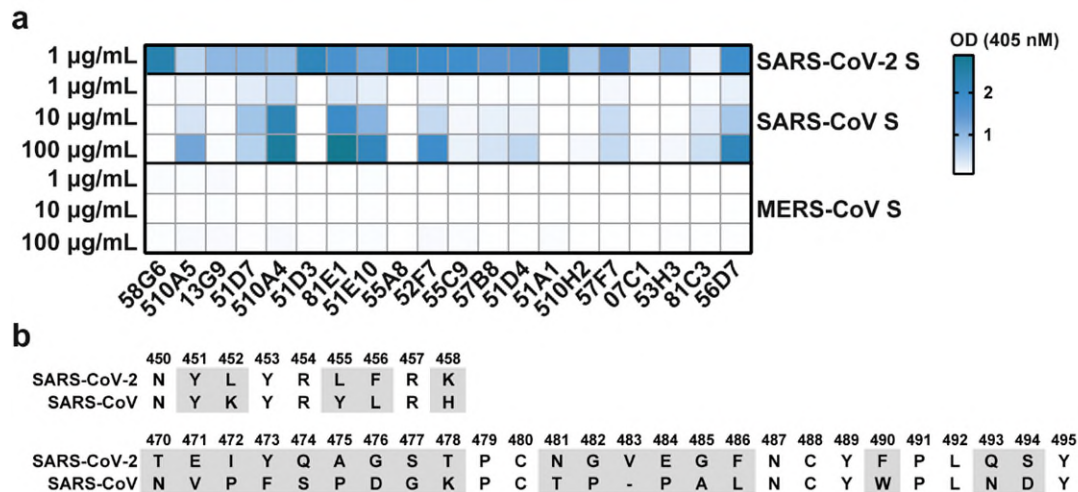

65

66 **Supplementary Fig. 4 The binding characteristics of the top 20 mAbs to SARS-**  
 67 **CoV-2 S, SARS-CoV S and MERS-CoV S. (a)** The binding capability of these top 20  
 68 mAbs to the S protein of SARS-CoV-2, SARS-CoV or MERS-CoV was tested with  
 69 various concentrations of the mAbs via ELISA. Data were representative of 2  
 70 independent experiments performed in technical duplicate. **(b)** Sequence alignment  
 71 with the amino acids corresponding to the antigenic sites of 13G9 or 58G6 on the S  
 72 protein of SARS-CoV-2 and SARS-CoV. The non-conserved residues between these  
 73 two viruses were displayed in grey.

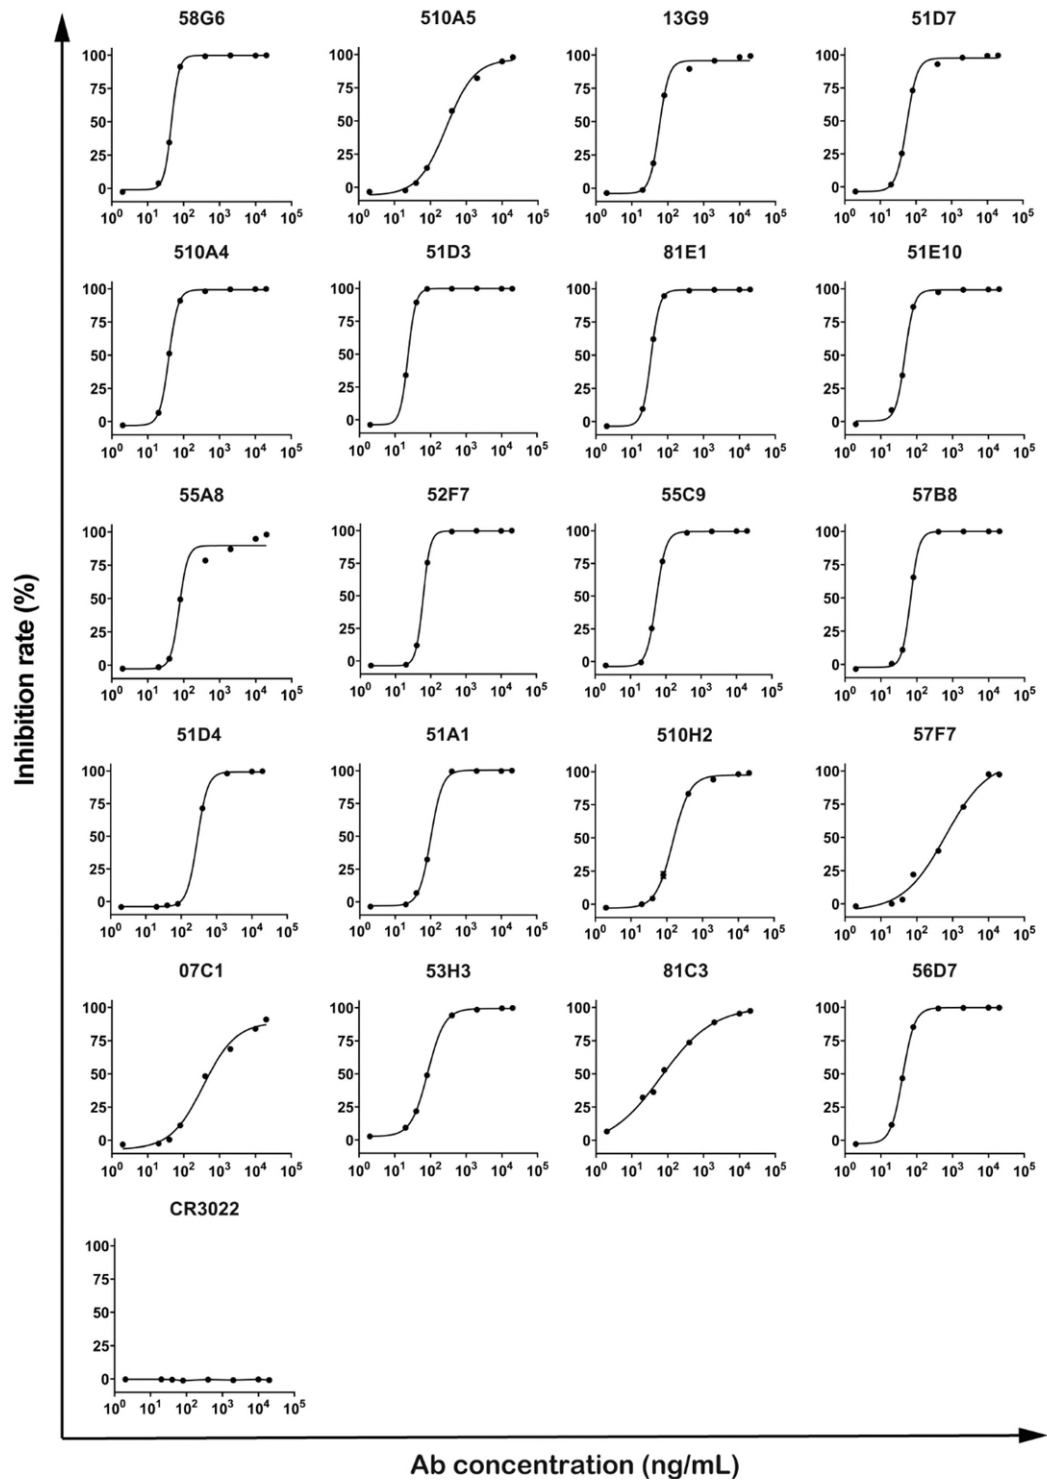

74

75 **Supplementary Fig. 5** The inhibition curves for the neutralizing Abs on the ACE2-

76 **RBD interaction.** Competitive ELISA for the neutralizing Abs to inhibit the ACE2-

77 RBD interaction. The SARS-CoV specific mAb CR3022 was used as the negative

78 control (n=2 biologically independent samples).

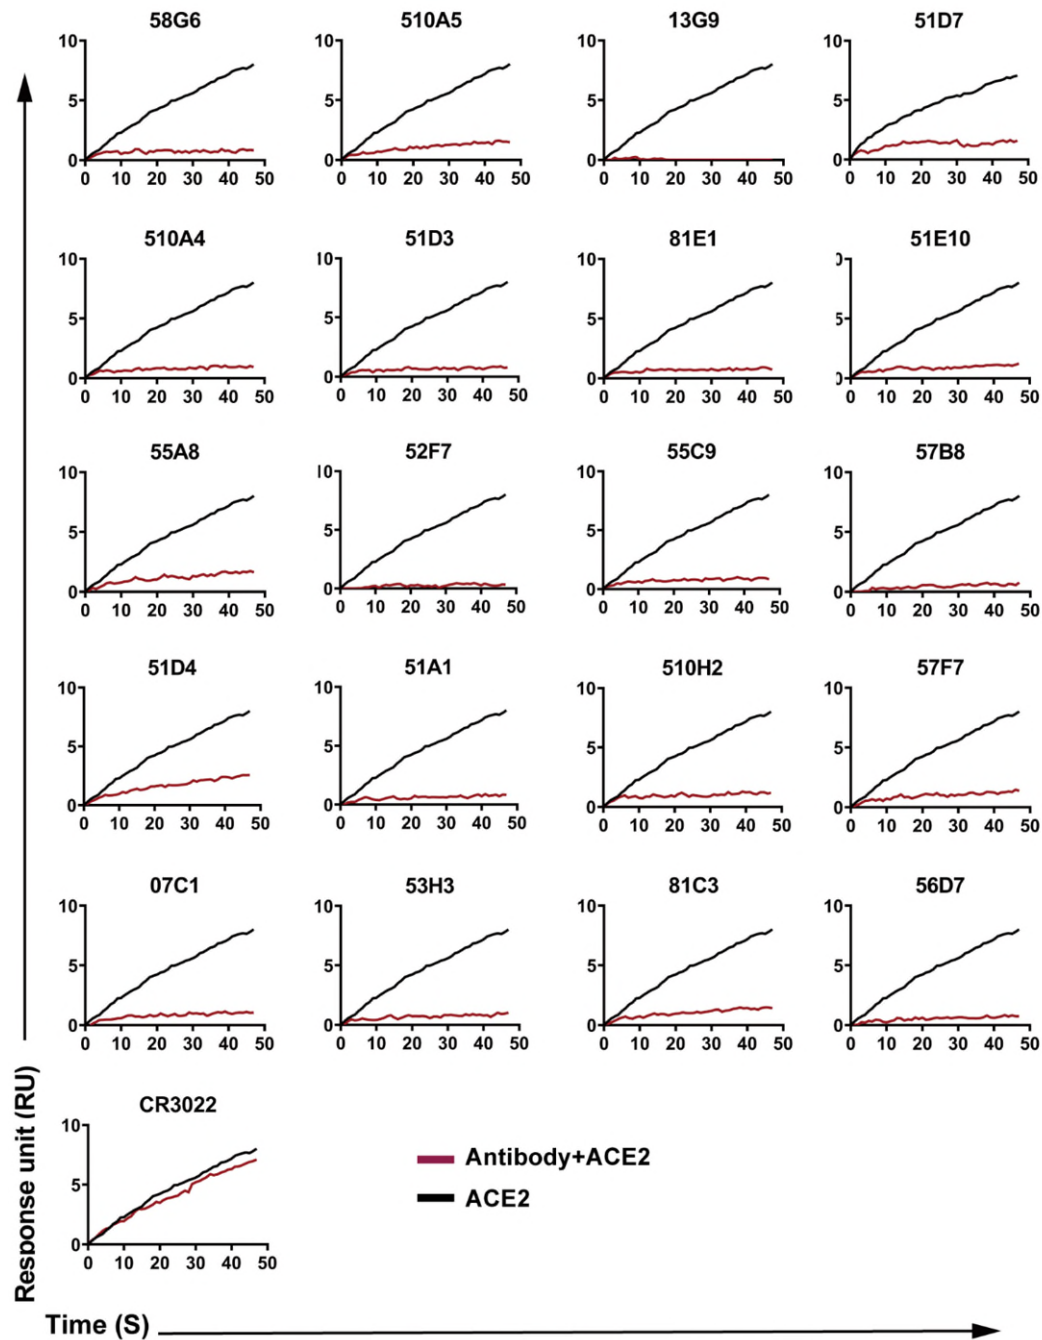

79

80 **Supplementary Fig. 6 Neutralizing Abs competing with ACE2 for the binding of**

81 **RBD.** In SPR assay, the purified soluble SARS-CoV-2 RBD protein was coated onto a

82 CM5 sensor chip followed by injection of individual neutralizing Abs at concentration

83 of 20  $\mu\text{g}/\text{mL}$ . The competition capacity of each antibody was indicated by the level of

84 reduction in the response unit of ACE2 comparing with or without prior antibody

85 incubation. The SARS-CoV RBD mAb CR3022 was used as the negative control.



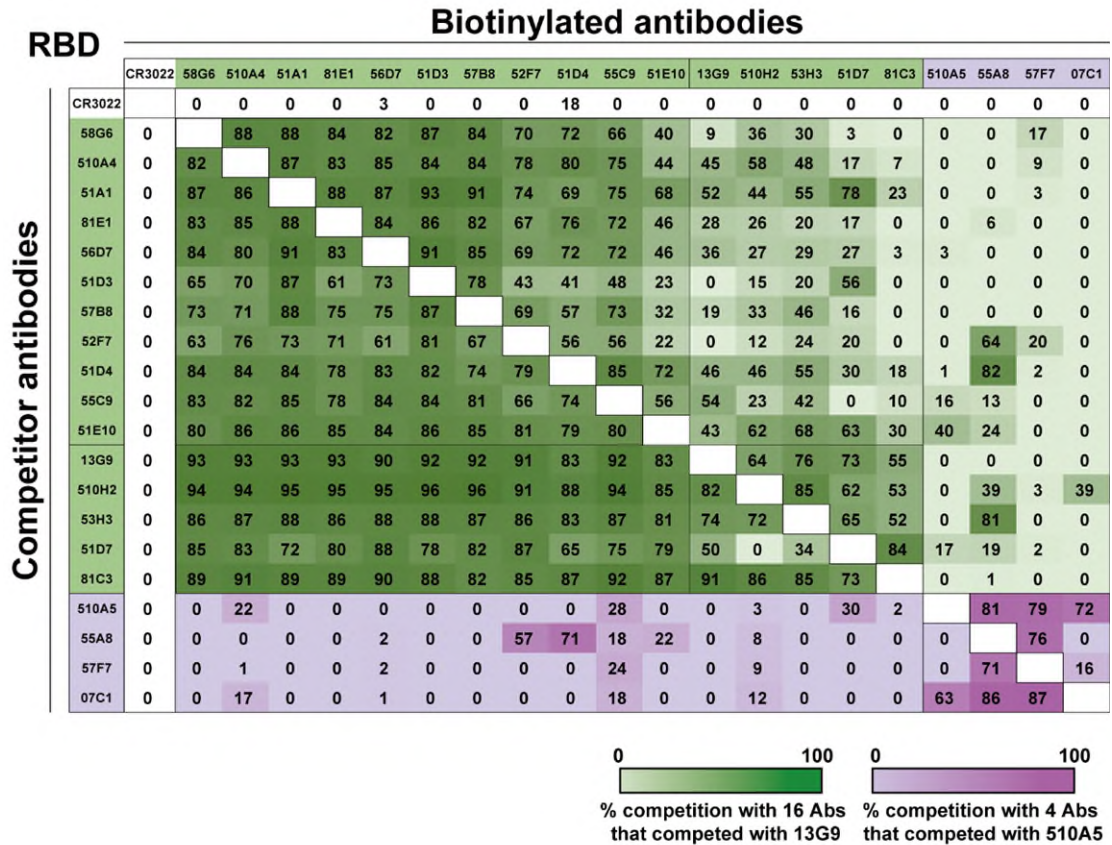

86

87 **Supplementary Fig. 7 The competitive analysis of potential epitopes recognized by**

88 **the top 20 neutralizing Abs.** Each of our 20 mAb was biotinylated and competed with

89 other unmodified mAbs for the identification of corresponding epitopes. The number

90 in each box indicated the inhibition rate between two mAbs tested by competitive

91 ELISA. Results were representatives of two independent experiments.

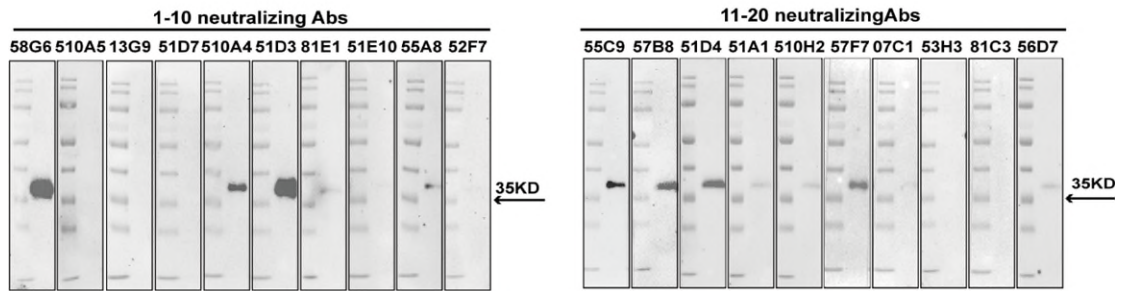

92 **Supplementary Fig. 8 The binding ability of purified mAbs to the denatured RBD.**

93 Western blot results of the 1-10 (left) and 11-20 (right) neutralizing Abs binding to the

94 denatured RBD. Data for each mAb were obtained from a representative of two

95 dependent experiments.

96

**a**

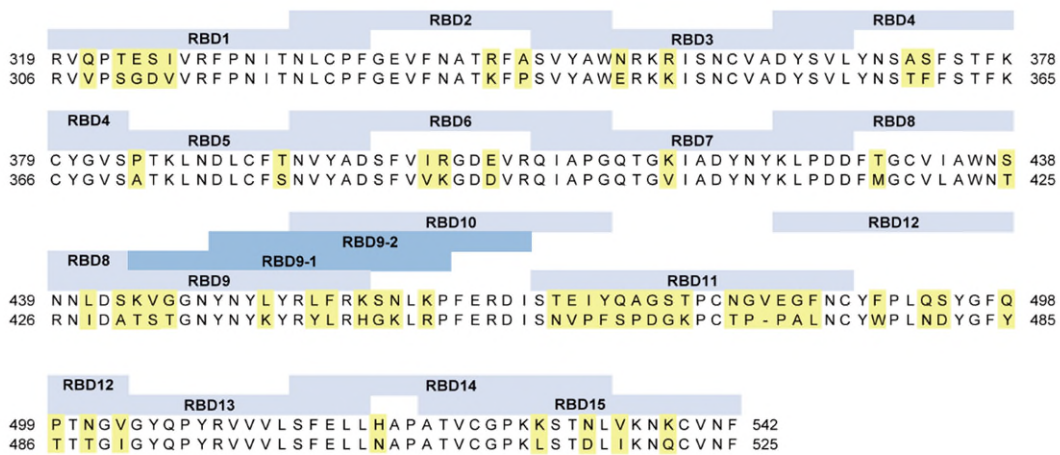

**b**

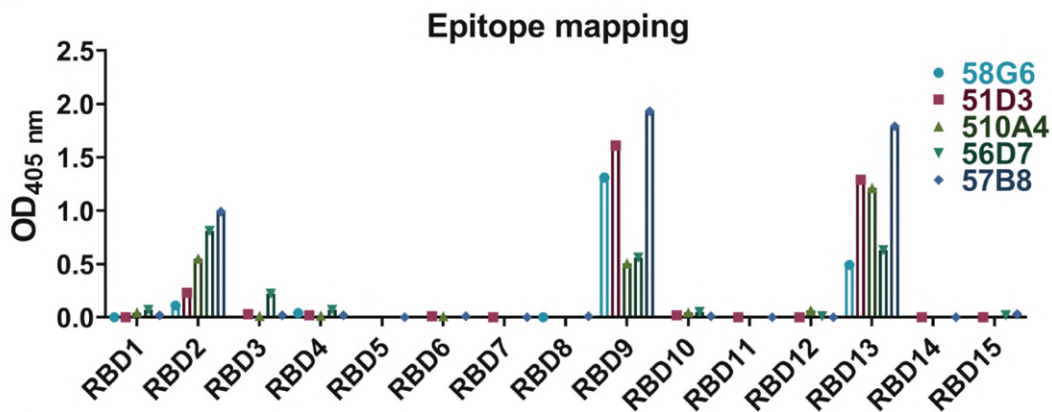

**c**

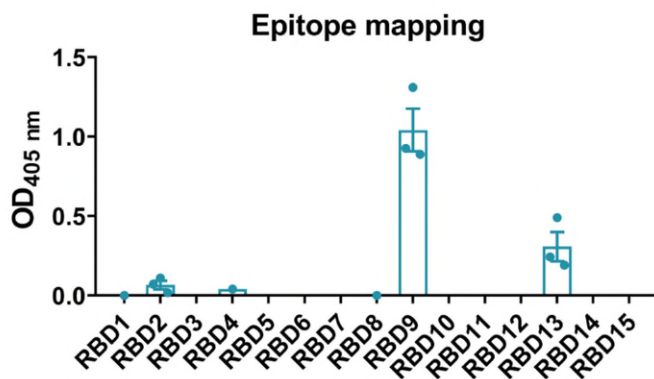

97

98 **Supplementary Fig. 9 The binding ability of purified mAbs to the RBD related**

99 **peptides. (a)** The amino acid sequences for the RBDs of SARS-CoV-2 and SARS-CoV

100 were aligned for comparison. Linear peptides designed for SARS-CoV-2 were shown

101 in ash blue and the names of the peptides were indicated in the boxes above. The non-

102 conserved residues between two viruses were displayed in yellow. **(b)** The interactions

103 of 5 out of 9 mAbs (58G6, 510A4, 51D3, 57B8 and 56D7) capable of binding to the  
104 denatured RBD to the linear peptides (RBD1-RBD15) were analyzed by peptide ELISA.  
105 The other 4 mAbs were incapable to react with synthesized peptides. (c) The  
106 interactions of 58G6 to RBD1-RBD15 were analyzed by peptide ELISA (n=3  
107 biologically independent samples). Data were presented as mean values  $\pm$  SEM.

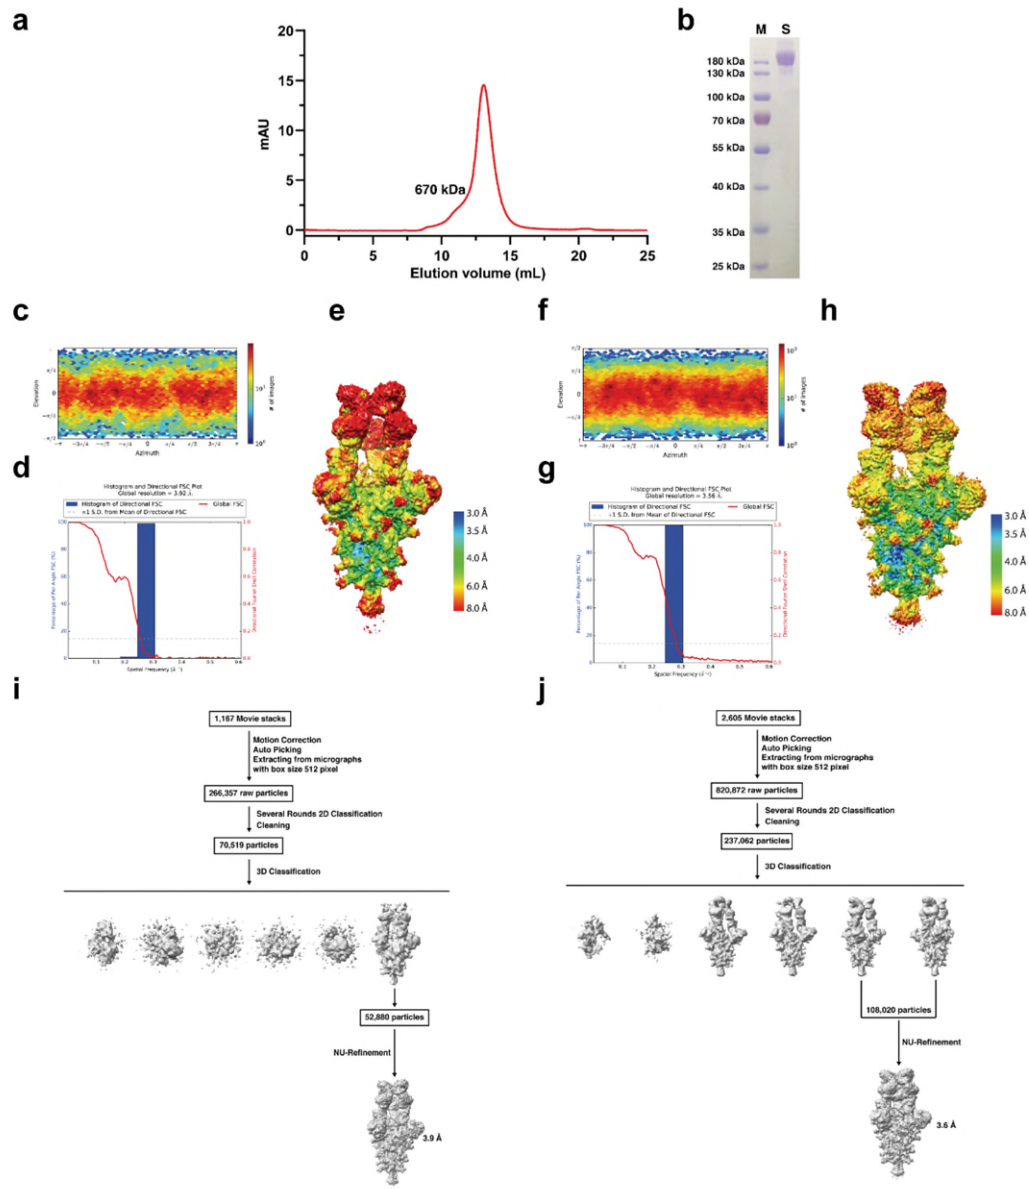

108

109 **Supplementary Fig. 10 Workflow for 13G9 and 58G6 cryo-EM 3D**

110 **Reconstructions.** (a) Gel filtration profile of the affinity-purified SARS-CoV-2 S

111 trimer. (b) SDS-PAGE analysis of the SARS-CoV-2 S protein. Data are representative

112 of 2 independent experiments performed. (c, g) Cryo-EM data processing workflow of

113 13G9 (c) and 58G6 (g). (d, h) The viewing direction distribution plot for SARS-CoV-

114 2 S in complex with 13G9 Fab (d) and 158G6 (h). (e, i) Global FSC and histogram. (f,

115 j) Cryo-EM density of SARS-CoV-2 S-Fab complexes, colored according to local

- 116 resolution, including locally refined reconstruction of the RBD-13G9 (f) or RBD-58G6
- 117 (j) variable domains.



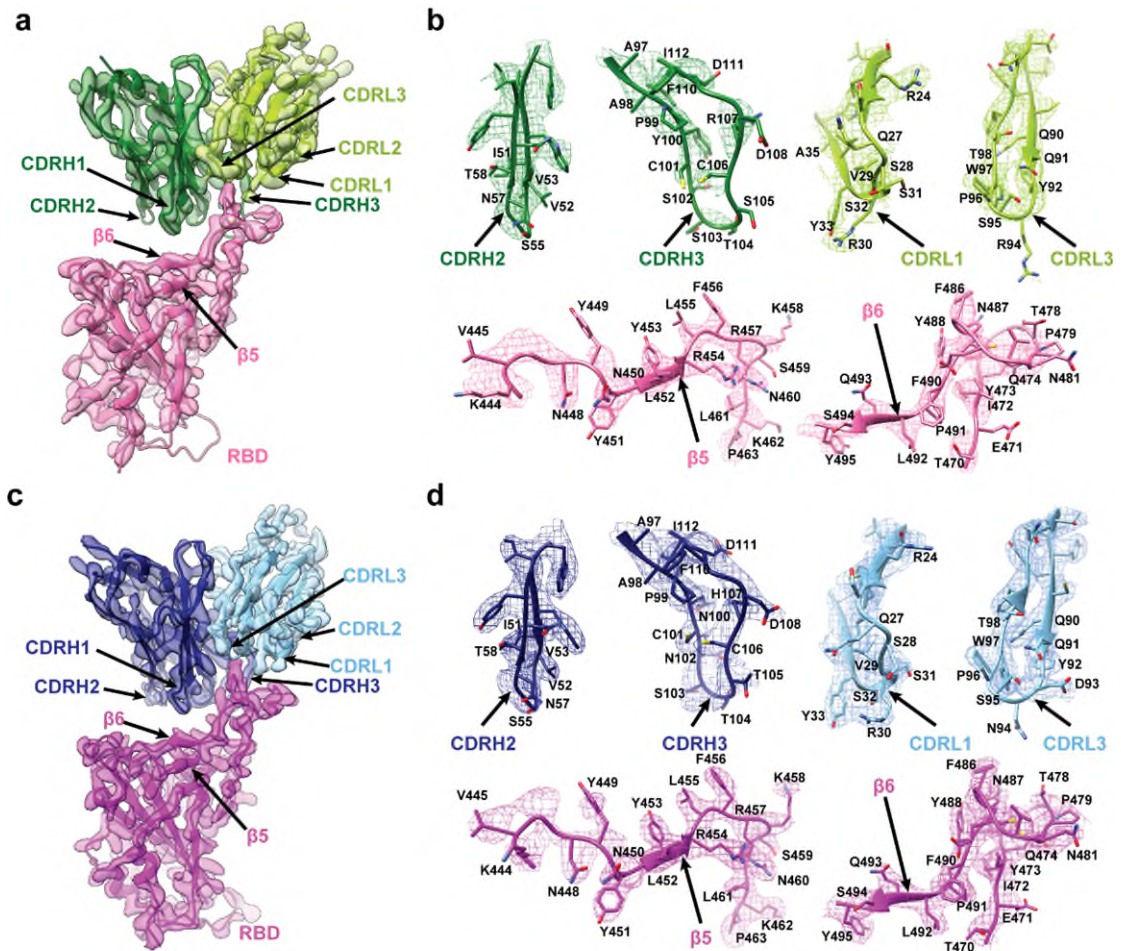

118

119 **Supplementary Fig. 11 Density maps and atomic models. (a, c) Cryo-EM maps of**

120 **the binding interface between SARS-CoV-2 RBD and 13G9 Fab (a) or 58G6 Fab (c)**

121 **variable domains. The color scheme is the same as in Fig. 4 and 5. (b, d) Density maps**

122 **(mesh) and related 13G9 CDRs (b) or 58G6 CDRs (d) atomic models. Residues are**

123 **shown as sticks, oxygen atoms are colored red, nitrogen atoms are colored blue and**

124 **sulfurs are shown in yellow.**

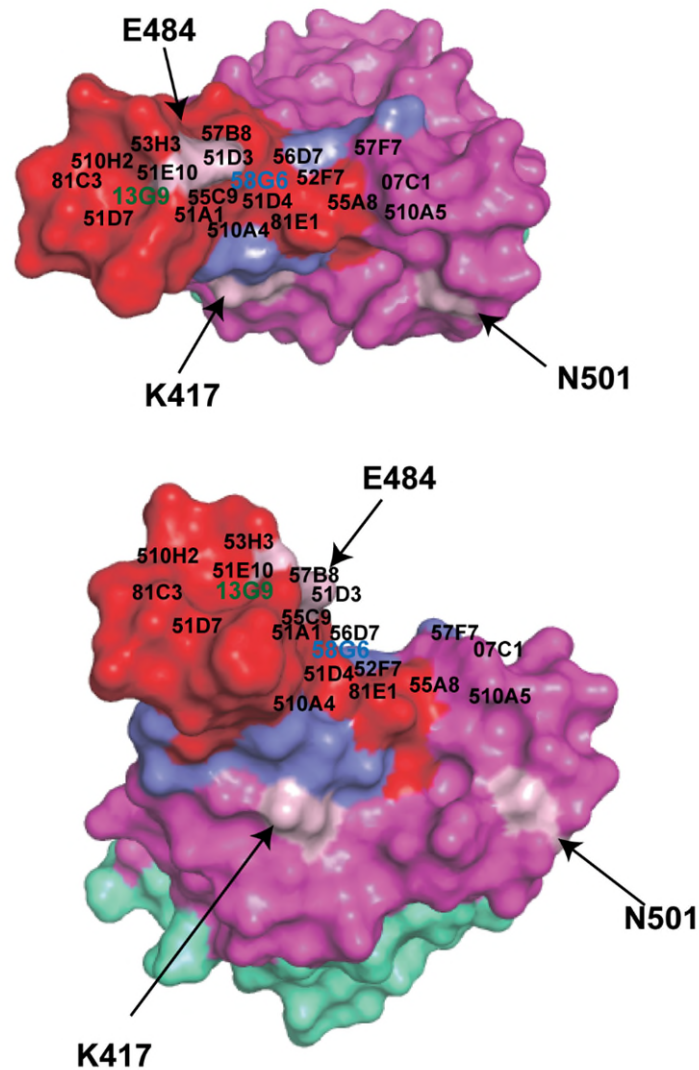

125 **Supplementary Fig. 12 Mapping of the epitopes for the top 20 neutralizing Abs**  
 126 **onto the surface of the viral RBD.** The data for mapping calculations were from  
 127 Supplementary Fig. 7. The view is chosen for clarity and is related to that shown in Fig.  
 128 5a, b. The epitopes for 58G6 and 13G9 were distinguished according to the color shown  
 129 in Fig. 5a, b. The epitope for CR3022 was colored cyan. Positions of the S<sup>K417</sup>, S<sup>E484</sup>,  
 130 and S<sup>N501</sup> were labeled with pink.



131 **Supplementary Table 1. Cryo-EM data collection and models refinement statistics**

132 **EM Data collection and reconstruction statistics**

---

|     |                                                  |                 |                |
|-----|--------------------------------------------------|-----------------|----------------|
| 133 | Protein                                          | S-58G6 Fab      | S-13G9 Fab     |
| 134 | Voltage (kV)                                     | 300             | 300            |
| 135 | Detector                                         | K3              | K3             |
| 136 | Pixel size (Å)                                   | 0.82            | 0.82           |
| 137 | Electron dose (e <sup>-</sup> / Å <sup>2</sup> ) | 60              | 60             |
| 138 | Defocus range                                    | 1.0-2.8         | 1.0-2.8        |
| 139 | Micrographs collected                            | 2605            | 1167           |
| 140 | Particles initial/final                          | 820,872/106,020 | 266,357/52,880 |
| 141 | Final resolution (Å)                             | 3.56            | 3.92           |

142

143 **Models refinement and validation statistics**

---

|     |                                |            |            |
|-----|--------------------------------|------------|------------|
| 144 | Protein                        | S-58G6 Fab | S-13G9 Fab |
| 145 | <b>RMSD</b>                    |            |            |
| 146 | Bond lengths (Å)               | 0.007      | 0.008      |
| 147 | Bond angles (°)                | 1.129      | 1.173      |
| 148 | <b>Ramachandran statistics</b> |            |            |
| 149 | Favored (%)                    | 91.00      | 91.98      |
| 150 | Allowed (%)                    | 8.91       | 7.93       |
| 151 | Outliers (%)                   | 0.09       | 0.09       |
| 152 | Rotamer outliers (%)           | 0.32       | 0.12       |
| 153 | Clash score                    | 8.99       | 12.66      |
| 154 | C-β outliers (%)               | 0.10       | 0.03       |
| 155 | CaBLAM outliers (%)            | 4.01       | 3.93       |

156

157 **Supplementary Table 2. The information of 58G6 and 13G9 variable genes and**  
 158 **sequences.**

| mAbs | VDJ information |         |          |         | CDR information |         |         |       |                  |            |
|------|-----------------|---------|----------|---------|-----------------|---------|---------|-------|------------------|------------|
|      | VH              | JH      | VL       | JL      | CDRH1           | CDRL1   | CDRH2   | CDRL2 | CDRH3            | CDRL3      |
| 58G6 | IGHV1-58        | IGHJ3-2 | IGKV3-20 | IGKJ1-1 | GFTFSSSA        | QSVRSSY | IVVGSNT | GAS   | AAPNCNSTTCHDGFDI | QQYDN*SPWT |
| 13G9 | IGHV1-58        | IGHJ3-2 | IGKV3-20 | IGKJ1-1 | GFTFSGSA        | QSVRSSY | IVVGSNT | GAS   | AAPYCSSTSCRDGFDI | QQYGR*SPWT |

159 VDJ alignment was determined by IgBLAST. The CDR sequences of 58G6 and 13G9  
 160 are aligned. Distinct amino acids were marked in red. The 94<sup>th</sup> amino acid on the  
 161 CDRH3 of mAb interacting with S<sup>E484</sup> is labelled with asterisk.

162

163 **Supplementary Table 3. The list of primers.**

| Gene name                      | Forward primer               | Reverse primer               |
|--------------------------------|------------------------------|------------------------------|
| SARS-CoV-2 N gene (nt 608-706) | 5'-GGGGAACCTCTCCTGCTAGAAT-3' | 5'-CAGACATTTTGCTCTCAAGCTG-3' |

164
